# Supplementary material
Source: PubMed Central journal article supplement (PMC4531360)
Supplement: supp_tpc.15.00390_tpc00390_Supplemental.pdf [file supp_tpc.15.00390_tpc00390_Supplemental.pdf]

**Supplemental Data. Ma et al. (2015). Plant Cell 10.1105/tpc.15.00390**

**Supplemental Figure 1.** SDS-PAGE of Ps109681rec from *P. pastoris* stained with Coomassie Blue. Left lane, molecular weight markers; right lane, isolated Ps109681 protein (at 27 kDa).

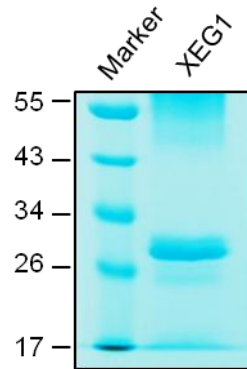

**Supplemental Figure 2.** SDS-PAGE analysis E136Drec and E222Drec protein stained with Coomassie Blue. Left lane, molecular weight markers; right lanes, isolated E136Drec protein and E222Drec protein (at 27 kDa).

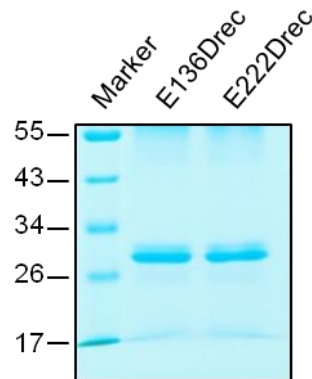

**Supplemental Figure 3.** Immunoblot analysis of GFP, INF1 and XEG1 wild type and mutant proteins produced in *N. benthamiana* during the experiments shown in Figure 6D. Upper panel, detection with anti-HA antibodies; lower panel, staining of the Rubisco band with Ponceau S.

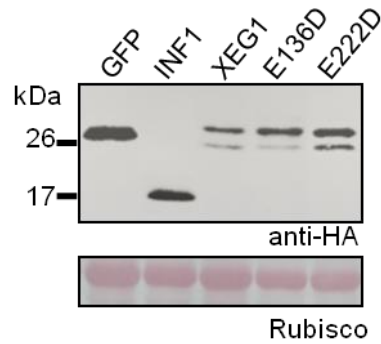

**Supplemental Figure 4.** Representative soybean leaves for suppression of XEG1-triggered cell death in soybean by Avh52, Avh62, Avh94 or Avh109. Experimental design using the double-barreled particle bombardment assay. Leaves bombarded with the pairs of DNA mixtures indicated.

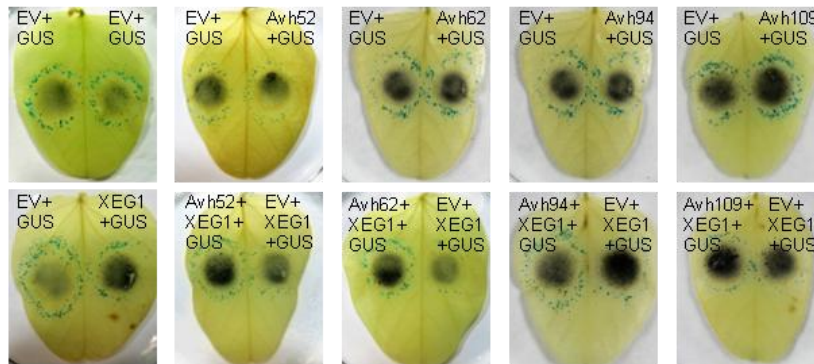

**Supplemental Figure 5.** Immunoblot analysis of GFP, Avh52, Avh62, Avh94 and Avh109 produced in *N. benthamiana* during the experiments shown in Figure 9. Upper panel, detection with anti-GFP antibodies; lower panel, staining of the Rubisco band with Ponceau S.

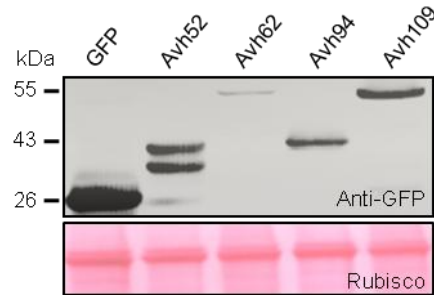

**Supplemental Figure 6.** Classification of *P. sojae* effectors based on suppression of cell death triggered by BAX, RXLR effectors, or the PAMPs INF1 and XEG1.

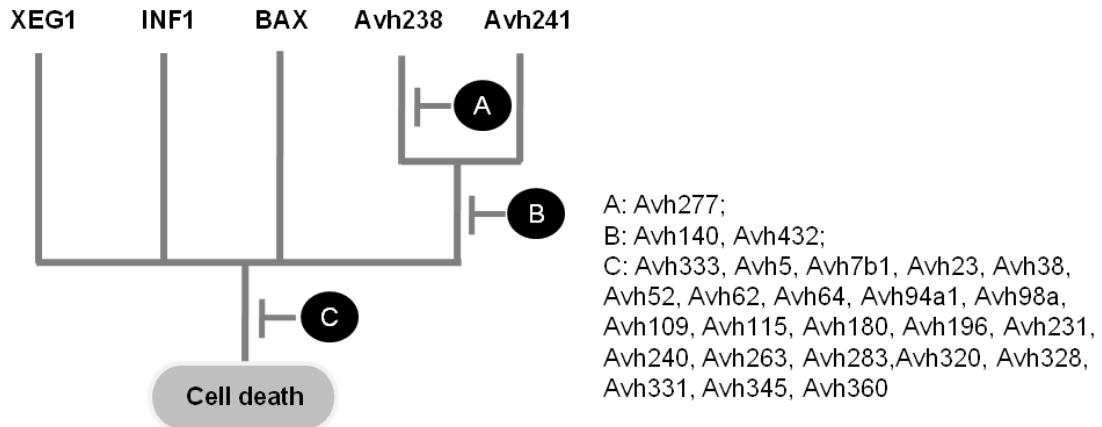











**Supplemental Table 1.** The MS/MS sequencing information of the proteins according to peak 3 after ultrafiltration.

| Hits | Prote<br>in<br>Mass | No. of<br>Peptide | Scan<br>No. | Peptide<br>Mass | Peptide sequence               | gi number <sup>a</sup> | JGI ID<br>( <i>Phytophthora<br/>sojæ</i> v1.1) <sup>b</sup> | Sequence<br>Header                                                                                                                                                                                                                             |
|------|---------------------|-------------------|-------------|-----------------|--------------------------------|------------------------|-------------------------------------------------------------|------------------------------------------------------------------------------------------------------------------------------------------------------------------------------------------------------------------------------------------------|
| 1    | 2659<br>8.7         | 4                 | 2658        | 836.4           | SYANAALK                       | 49476326               | 109281                                                      | >gi 49476326 gb                                                                                                                                                                                                                                |
|      |                     |                   | 3024        | 1471.7          | QTTYTFEADLRK                   |                        |                                                             | AAT66504.1  cell                                                                                                                                                                                                                               |
|      |                     |                   | 3048        | 1115.6          | FDPVQVANVK                     |                        |                                                             | 12A                                                                                                                                                                                                                                            |
|      |                     |                   | 3114        | 1343.6          | QTTYTFEADLR                    |                        |                                                             | endoglucanase<br>[ <i>Phytophthora<br/>sojæ</i> ]                                                                                                                                                                                              |
| 2    | 2559<br>7.7         | 4                 | 3060        | 1236.6          | TITNFSADLQK                    | 78127394               | 109681                                                      | >gi 78127394 gb                                                                                                                                                                                                                                |
|      |                     |                   | 3072        | 1185.6          | SYSNAALVFSK                    |                        |                                                             | ABB22029.1  cell                                                                                                                                                                                                                               |
|      |                     |                   | 3078        | 870.5           | FLSYLTK                        |                        |                                                             | 12A                                                                                                                                                                                                                                            |
|      |                     |                   | 3586        | 2734.4          | NQGLPSSQYLITLEAGT<br>EPFVGTNAK |                        |                                                             | endoglucanase<br>[ <i>Phytophthora<br/>sojæ</i> ]                                                                                                                                                                                              |
| 3    | 4268<br>1.4         | 2                 | 3092        | 1327.7          | AIVDSGTSLIAGPK                 | 66270071               | 158318                                                      | >gi 66270071 gb                                                                                                                                                                                                                                |
|      |                     |                   | 3870        | 1994.0          | FDGLFGLAFDTSVDHL<br>K          |                        |                                                             | AAY43365.1 <br>aspartic protease<br>[ <i>Phytophthora<br/>infestans</i> ] gi 31070<br>4916 gb ADP0819<br>1.1  aspartic<br>protease 1<br>[ <i>Phytophthora<br/>infestans</i> ]                                                                  |
| 4    | 6596<br>3.6         | 1                 | 3742        | 2445.2          | VNLWTFNEPLSFTTAG<br>YATGR      | 301120678              | 137930                                                      | >gi 301120678 ref<br> XP_002908066.1<br> <br>beta-glucosidase,<br>putative<br>[ <i>Phytophthora<br/>infestans</i><br>T30-4] gi 2621030<br>97 gb EEY61149.<br>1 <br>beta-glucosidase,<br>putative<br>[ <i>Phytophthora<br/>infestans</i> T30-4] |

<sup>a</sup>gi number: Gene IDs of *Phytophthora sojæ*; identical at <http://www.ncbi.nlm.nih.gov/genbank/>

<sup>b</sup>JGI ID: Gene IDs of *Phytophthora sojæ*; identical at [http://genome.jgi-psf.org/Physo1\\_1/Physo1\\_1.home.html](http://genome.jgi-psf.org/Physo1_1/Physo1_1.home.html)

**Supplemental Table 2. Information of Primers Used.**

| Primer name                                | Primer 5'-3' <sup>a</sup>                              | Purpose                                                                            |
|--------------------------------------------|--------------------------------------------------------|------------------------------------------------------------------------------------|
| pGR107-Cla I-109281-F                      | ccatcgatATGAAGCTCTCTGCTGCTG                            | Clone 109281 for expression in <i>N. benthamiana</i>                               |
| pGR107-109281-Sma I-R                      | gggGGCCGTGTGGACGGCGGC                                  | Clone 109281 for expression in <i>N. benthamiana</i>                               |
| pGR107-Cla I-109681-F                      | ccatcgatATGAAGGGATTCTTCGCCG                            | Clone 109681 for expression in <i>N. benthamiana</i>                               |
| pGR107-109681-Sma I-R                      | gggGTTGACCGCAGCCGAGAAC                                 | Clone 109681 for expression in <i>N. benthamiana</i>                               |
| pGR107-Cla I-158318-F                      | ccatcgatATGCTGCGCTGCTCGCTGC                            | Clone 158318 for expression in <i>N. benthamiana</i>                               |
| pGR107-158318-Not I-R                      | ataagaatgcggccgcCTTGTCTGAGGTATTCTCTTG                  | Clone 158318 for expression in <i>N. benthamiana</i>                               |
| pGR107-Cla I-137930-F:                     | ccatcgatATGCAGAGGCTTCTCCATC                            | Clone 137930 for expression in <i>N. benthamiana</i>                               |
| pGR107-137930-Sma I-R                      | gggCAGCAAGCGAGTTGCTTCG                                 | Clone 137930 for expression in <i>N. benthamiana</i>                               |
| pGR107-Cla I-GFP-F                         | ccatcgatATGGTGAGCAAGGGCGAGG                            | Clone GFP for expression in <i>N. benthamiana</i>                                  |
| pGR107-GFP-Sma I- R                        | gggTCACTTGTACAGCTCGTCCATG                              | Clone GFP for expression in <i>N. benthamiana</i>                                  |
| pGR107-Cla I-INF1-F                        | ccatcgatATGAACCTTCGTGCTCTGT                            | Clone INF1 for expression in <i>N. benthamiana</i>                                 |
| pGR107-INF1-Sma I- R                       | gggTCATAGCGACGCACACGTAGAC                              | Clone INF1 for expression in <i>N. benthamiana</i>                                 |
| pPICZaA-EcoRI-109681-F                     | ggaatccGGAGACTACTGCGGCCAGTGGGA                         | Expression of XEG1 E136D and XEG1 E222D in <i>Pichia pastoris</i> for purification |
| pPICZaA-109681-NotI-R                      | ataagaatgcggccgcGTTGACCGCAGCCGAGAACGAG<br>GA           | Expression of XEG1 E136D and XEG1 E222D in <i>Pichia pastoris</i> for purification |
| pGR107-PR1-SP-109681 <sup>20-241</sup> -F1 | ccatcgatATGGGATTGTCTCTTTTCGCA                          | Expression of PR1-SP-XEG1 <sup>20-241</sup> in <i>N. benthamiana</i>               |
| pGR107-PR1-SP-109681 <sup>20-241</sup> -R1 | TGGCCAGTCCCACTGGCCGAGTAGTCTCCGG<br>CACGGCAAGAGTGGGATAT | Expression of PR1-SP-XEG1 <sup>20-241</sup> in <i>N. benthamiana</i>               |
| pGR107-PR1-SP-109681 <sup>20-241</sup> -F2 | GGAGACTACTGCGGCCAGTGGGACTG                             | Expression of PR1-SP-XEG1 <sup>20-241</sup> in <i>N. benthamiana</i>               |
| pGR107-PR1-SP-109681 <sup>20-241</sup> -R2 | gggGTTGACCGCAGCCGAGAACGAGGA                            | Expression of PR1-SP-XEG1 <sup>20-241</sup> in <i>N. benthamiana</i>               |
| pGR107-109681 <sup>20-241</sup> -F         | ccatcgatGGAGACTACTGCGGCCAGTGGGACTG                     | Expression of XEG1 <sup>20-241</sup> in <i>N. benthamiana</i>                      |
| pGR107-109681 <sup>20-241</sup> -R         | gggGTTGACCGCAGCCGAGAACGAGGA                            | Expression of XEG1 <sup>20-241</sup> in <i>N. benthamiana</i>                      |
| NbSerk3-qRT-F                              | TCCTGACGGACCATCTCCTCTTT                                | RT-qPCR for validation of the Serk3/Bak1 gene transcription level                  |
| NbSerk3-qRT-R                              | GCTCATAACTGGGCAAGGGGCTT                                | RT-qPCR for validation of the Serk3/Bak1 gene transcription level                  |
| NbSerk1-Sil-EcoRI-F                        | ggaattcGCCCTTAACTGGGCAACGGGCT                          | Silencing of Serk1 in <i>N. benthamiana</i>                                        |
| NbSerk1-Sil-BamHI-R                        | cgggatccGTGAGGGTGGTGAGCAGGATAA                         | Silencing of Serk1 in <i>N. benthamiana</i>                                        |
| GFP-Sil-EcoRI-F                            | ggaattcGTGAGCAAGGGCGAGGAGCTGT                          | Negative control for silencing of Serk1 in <i>N. benthamiana</i>                   |
| GFP-Sil-EcoRI-F                            | cgggatccGTCCTTGAAGAAGATGGTGCCT                         | Negative control for silencing of Serk1 in <i>N. benthamiana</i>                   |
| pGR107-ClaI-144813-F1                      | ccatcgatATGAAGAGCTTTCTCCAACCTCGT                       | Clone 144813 of <i>P. sojae</i> for expression in <i>N. benthamiana</i>            |
| pGR107-144813-SmaI-R2                      | gggGTTGACAGCGCGGAGAACGAGGA                             | Clone 144813 of <i>P. sojae</i> for expression in <i>N. benthamiana</i>            |
| pGR107-ClaI-119627-F                       | ccatcgatATGAAGGTTGCGTTGCTACT                           | Clone 119627 of <i>P. sojae</i> for expression in <i>N. benthamiana</i>            |
| pGR107-119627-SmaI-R                       | gggGACGCGACGAACACTGCGGCTA                              | Clone 119627 of <i>P. sojae</i> for expression in <i>N. benthamiana</i>            |
| pGR107-ClaI-138787-F                       | ccatcgatATGAAGGTTCTGTTCCGCACTGCT                       | Clone 138787 of <i>P. sojae</i> for expression in <i>N. benthamiana</i>            |
| pGR107-138787-Sma I-R                      | gggCTCGCGACGAACGCGACGGAGCA                             | Clone 138787 of <i>P. sojae</i> for expression in <i>N. benthamiana</i>            |
| pGR107-ClaI-140300-F                       | ccatcgatATGAAGCTCTCCGTCGCCATCGCCT                      | Clone 140300 of <i>P. sojae</i> for expression in <i>N. benthamiana</i>            |
| pGR107-140300-Sma I-R                      | gggCGCCGAGTTGACTGCTACTGAGTA                            | Clone 140300 of <i>P. sojae</i> for expression in <i>N. benthamiana</i>            |
| pGR107-ClaI-140302-F                       | ccatcgatATGAAGAGCTCCGCCGCTCCTCGCT                      | Clone 140302 of <i>P. sojae</i> for expression in <i>N. benthamiana</i>            |
| pGR107-140302-Sma I-R                      | gggCTGCTGCTGGACCTGCGAGTACT                             | Clone 140302 of <i>P. sojae</i> for expression in <i>N. benthamiana</i>            |
| pGR107-ClaI-109280-F                       | ccatcgatATGAAGTTCTGCTCCCCGCCA                          | Clone 109280 of <i>P. sojae</i> for expression in <i>N. benthamiana</i>            |
| pGR107-109280-Sma I-R                      | gggCTTGACCTGCACGGAGTAGGACGA                            | Clone 109280 of <i>P. sojae</i> for expression in <i>N. benthamiana</i>            |
| pGR107-ClaI-109281-F                       | ccatcgatATGAAGCTCTGCTGCTGTTCT                          | Clone 109281 of <i>P. sojae</i> for expression in <i>N. benthamiana</i>            |



|                          |                                        |                                                                           |
|--------------------------|----------------------------------------|---------------------------------------------------------------------------|
| pGR107-109281-Sma I-R    | gggGGCCGTGTGGACGGCGCCGAGTA             | Clone 109281 of <i>P. sojae</i> for expression in <i>N. benthamiana</i>   |
| pGR107-Clal-140301-F     | ccatcgatATGCAGATCTCCACCGTTCTCACT       | Clone 140301 of <i>P. sojae</i> for expression in <i>N. benthamiana</i>   |
| pGR107-140301-Sma I-R    | gggGTTGGCGCCGGCCGTGTGGACT              | Clone 140301 of <i>P. sojae</i> for expression in <i>N. benthamiana</i>   |
| pGR107-Clal-140303-F     | ccatcgatATGAAGTTCTCGCTTACTGCCGT        | Clone 140303 of <i>P. sojae</i> for expression in <i>N. benthamiana</i>   |
| pGR107-140303-Not I-R    | ataagaatcgggccgcATTCTGAGAGAAGCCGACGTCT | Clone 140303 of <i>P. sojae</i> for expression in <i>N. benthamiana</i>   |
| C                        |                                        |                                                                           |
| pGR107-Clal-140289-F     | ccatcgatATGAAGTTCCTGCTCCCCGCCAC        | Clone 140289 of <i>P. sojae</i> for expression in <i>N. benthamiana</i>   |
| pGR107-140289-Sma I-R    | gggCTTGACCTGCACTGAGTAGGACGA            | Clone 140289 of <i>P. sojae</i> for expression in <i>N. benthamiana</i>   |
| pGR107-Clal-Pc111741-F   | ccatcgatATGAAGGGCTTCTTCACTGGTGT        | Clone 111741 of <i>P. capsici</i> for expression in <i>N. benthamiana</i> |
| pGR107-Pc111741-Smal-R   | gggGTTGACAGCAGCCGAGAATGA               | Clone 111741 of <i>P. capsici</i> for expression in <i>N. benthamiana</i> |
| pGR107-Clal-Pc98553-F    | ccatcgatATGAAAGTGCTTTTCACTGTGG         | Clone 98553 of <i>P. capsici</i> for expression in <i>N. benthamiana</i>  |
| pGR107-Pc98553-Smal-R    | gggCACACGACGAACACGTCGGCT               | Clone 98553 of <i>P. capsici</i> for expression in <i>N. benthamiana</i>  |
| pGR107-Clal-Pc99469-F    | ccatcgatATGAAGTCTTCTTCGCTGCT           | Clone 99469 of <i>P. capsici</i> for expression in <i>N. benthamiana</i>  |
| pGR107-Pc99469-Smal-R    | gggGTCACGACGGACGCGACGAAG               | Clone 99469 of <i>P. capsici</i> for expression in <i>N. benthamiana</i>  |
| pGR107-Clal-Pc107440-F   | ccatcgatATGAAGCTCTCCGTGCCAT            | Clone 107440 of <i>P. capsici</i> for expression in <i>N. benthamiana</i> |
| pGR107-Pc107440-Smal-R   | gggAGCCGTGTGACCCGCCGCGA                | Clone 107440 of <i>P. capsici</i> for expression in <i>N. benthamiana</i> |
| pGR107-Clal-Pc107334-F   | ccatcgatATGAAGCTTTCGCGCTGCT            | Clone 107334 of <i>P. capsici</i> for expression in <i>N. benthamiana</i> |
| pGR107-Pc107334-Smal-R   | gggGACCGCTGGACTGCCGAGA                 | Clone 107334 of <i>P. capsici</i> for expression in <i>N. benthamiana</i> |
| pGR107-Clal-Pc106898-F   | ccatcgatATGAAGTTCCTCTCCAGTT            | Clone 106898 of <i>P. capsici</i> for expression in <i>N. benthamiana</i> |
| pGR107-Pc106898-Smal-R   | gggCTTCACCTGCACCGAATACG                | Clone 106898 of <i>P. capsici</i> for expression in <i>N. benthamiana</i> |
| pGR107-Clal-Pc107122-F   | ccatcgatATGAAACTCTTACCATTATC           | Clone 107122 of <i>P. capsici</i> for expression in <i>N. benthamiana</i> |
| pGR107-Pc107122-Smal-R   | gggAACAGTGTGGACAGCCGCGT                | Clone 107122 of <i>P. capsici</i> for expression in <i>N. benthamiana</i> |
| pGR107-Clal-Pc15454-F    | ccatcgatATGAAACTCTTACCATTATC           | Clone 15454 of <i>P. capsici</i> for expression in <i>N. benthamiana</i>  |
| pGR107-Pc15454-Smal-R    | gggAACAGTGTGGACAGCCGCGT                | Clone 15454 of <i>P. capsici</i> for expression in <i>N. benthamiana</i>  |
| pGR107-Clal-Pc15453-F    | ccatcgatATGAAACTTTTCGCCATTATC          | Clone 15453 of <i>P. capsici</i> for expression in <i>N. benthamiana</i>  |
| pGR107-Pc15453-Smal-R    | gggAACAGTGTGAACAGCAGCCGT               | Clone 15453 of <i>P. capsici</i> for expression in <i>N. benthamiana</i>  |
| pGR107-Clal-Pc107461-F   | ccatcgatATGAAGTCTCTACTATCTTC           | Clone 107461 of <i>P. capsici</i> for expression in <i>N. benthamiana</i> |
| pGR107-Pc107461-Smal-R   | gggCGCAGTGTGAACAGCAGCGGT               | Clone 107461 of <i>P. capsici</i> for expression in <i>N. benthamiana</i> |
| pGR107-Clal-Pc15451-F    | ccatcgatATGAAGTTCCTTATCCCGCTA          | Clone 15451 of <i>P. capsici</i> for expression in <i>N. benthamiana</i>  |
| pGR107-Pc15451-Smal-R    | gggGTTGACCTTGATGAGTAGGACT              | Clone 15451 of <i>P. capsici</i> for expression in <i>N. benthamiana</i>  |
| pGR107-Clal-Pc7335-F     | ccatcgatATGAAGTTCCTTCTGCCGCCA          | Clone 7335 of <i>P. capsici</i> for expression in <i>N. benthamiana</i>   |
| pGR107-Pc7335-Smal-R     | gggTGCAGGCTCACAGAGACTTTGA              | Clone 7335 of <i>P. capsici</i> for expression in <i>N. benthamiana</i>   |
| pGR107-Clal-PPIG19377-F  | ccatcgatATGAAGGGACTTCTCGCAGGTACCA      | Clone PPTG_19377 for expression in <i>N. benthamiana</i>                  |
| pGR107-PPIG19377-Sma I-R | gggGTTGACAGCAGCCGAGTACGACGA            | Clone PPTG_19377 for expression in <i>N. benthamiana</i>                  |
| pGR107-Clal-PPIG19378-F  | ccatcgatATGAAGAGCTTCTCATCGCGAT         | Clone PPTG_19378 for expression in <i>N. benthamiana</i>                  |
| pGR107-PPIG19378-Smal-R  | gggGTTGACGCGCCGAGTAGGAA                | Clone PPTG_19378 for expression in <i>N. benthamiana</i>                  |
| pGR107-Clal-PPIG16567-F  | ccatcgatATGATAATGCTTTACGCTGCTA         | Clone PPTG_16567 for expression in <i>N. benthamiana</i>                  |
| pGR107-PPIG16567-Smal-R  | gggCGCACGACGAACACGACGGCT               | Clone PPTG_16567 for expression in <i>N. benthamiana</i>                  |
| pGR107-Clal-PPIG16566-F  | ccatcgatATGAAGGTGTTCTTTGCTGCT          | Clone PPTG_16566 for expression in <i>N. benthamiana</i>                  |
| pGR107-PPIG16566-Smal-R  | gggGTCACGACGGACGCGACGAA                | Clone PPTG_16566 for expression in <i>N. benthamiana</i>                  |
| pGR107-Smal-PPIG19220-F  | gggATGAAGTTCCTGCCATCGCT                | Clone PPTG_19220 for expression in <i>N. benthamiana</i>                  |
| pGR107-PPIG19220-NotI-R  | ataagaatcgggccgcAACGGTGTGGACCGCGCAG    | Clone PPTG_19220 for expression in <i>N. benthamiana</i>                  |
| pGR107-Clal-PPIG16273-F  | ccatcgatATGAAGATCTCTATCGCCAT           | Clone PPTG_16273 for expression in <i>N. benthamiana</i>                  |
| pGR107-PPIG16273-Smal-R  | gggAGCCGACTTGACTGCTGCCGA               | Clone PPTG_16273 for expression in <i>N. benthamiana</i>                  |
| pGR107-Clal-PPIG16272-F  | ccatcgatATGAAGCTTTCCTTCGCTGCTG         | Clone PPTG_16272 for expression in <i>N. benthamiana</i>                  |
| pGR107-PPIG16272-Smal-R  | gggAACTGTGTGGACAGCGGCCGA               | Clone PPTG_16272 for expression in <i>N. benthamiana</i>                  |
| pGR107-Smal-PPIG19219-F  | gggATGAAGTTCCTATCGCCATT                | Clone PPTG_19219 for expression in <i>N. benthamiana</i>                  |
| pGR107-PPIG19219-NotI-R  | ataagaatcgggccgcAGTAGTCATTTTGAAGAAT    | Clone PPTG_19219 for expression in <i>N. benthamiana</i>                  |

|                              |                                             |                                                                            |
|------------------------------|---------------------------------------------|----------------------------------------------------------------------------|
| pGR107-Clal-PPIG16267-F      | ccatcgatATGAAGTTCCTGATCCCTGCT               | Clone PPTG_16267 for expression in <i>N. benthamiana</i>                   |
| pGR107-PPIG16267-Smal-R      | gggCTTGACTTGACCCGAGTAGGT                    | Clone PPTG_16267 for expression in <i>N. benthamiana</i>                   |
| pGR107-Clal-PPIG16271-F      | ccatcgatATGAAGTTCCTGATCCCTGCT               | Clone PPTG_16271 for expression in <i>N. benthamiana</i>                   |
| pGR107-PPIG16271-Smal-R      | gggGTTGACCTTCGACGAGTACGA                    | Clone PPTG_16271 for expression in <i>N. benthamiana</i>                   |
| pGR107-Smal-PPIG19278-F      | gggATGAAGTTCCTTTTCGCTGTT                    | Clone PPTG_19278 for expression in <i>N. benthamiana</i>                   |
| pGR107-PPIG19278-NotI-R      | ataagaatgcgccgcATTAATTGAGGGAGAAGATG         | Clone PPTG_19278 for expression in <i>N. benthamiana</i>                   |
| pGR107-Clal-PITG06962-F      | ccatcgatATGAAGGTGTTCTTCGCTGCTGCT            | Clone PITG_06962 for expression in <i>N. benthamiana</i>                   |
| pGR107-PITG06962-Sma I-R     | gggTCGTCCCCTGAAGAAGTCGGAGA                  | Clone PITG_06962 for expression in <i>N. benthamiana</i>                   |
| pGR107-Clal-PITG16991-F      | ccatcgatATGAAGTTTACTGTCGTCATTGCT            | Clone PITG_16991 for expression in <i>N. benthamiana</i>                   |
| pGR107-PITG16991-Sma I-R     | gggCGAATTGACTGCTGCCGAGTA                    | Clone PITG_16991 for expression in <i>N. benthamiana</i>                   |
| pGR107-Clal-PITG08944-F      | ccatcgatATGAAGCTCCTGATCCCTGCTACT            | Clone PITG_08944 for expression in <i>N. benthamiana</i>                   |
| pGR107-PITG08944-Sma I-R     | gggGTTACCTTCGACGAGTACGATT                   | Clone PITG_08944 for expression in <i>N. benthamiana</i>                   |
| pGR107-Smal-PITG16992-F      | gggATGAAGCTCGTGTGGCCCT                      | Clone PITG_16992 for expression in <i>N. benthamiana</i>                   |
| pGR107-PITG16992-NotI-R      | ataagaatgcgccgcAGCTGTGTGAAGTGCAGTCGA        | Clone PITG_16992 for expression in <i>N. benthamiana</i>                   |
| pGR107-Clal-PITG14060-F      | ccatcgatATGAAACTCTCTGCTGCCCT                | Clone PITG_14060 for expression in <i>N. benthamiana</i>                   |
| pGR107-PITG14060-Smal-R      | gggCGTCGAGGCAGTGTAAACCG                     | Clone PITG_14060 for expression in <i>N. benthamiana</i>                   |
| pGR107-Clal-PITG13560-F      | ccatcgatATGAAGCTCCCTCTTGTTCAT               | Clone PITG_13560 for expression in <i>N. benthamiana</i>                   |
| pGR107-PITG13560-Sma I-R     | gggTAATGGCGTCTTTCGCTGGGTCGT                 | Clone PITG_13560 for expression in <i>N. benthamiana</i>                   |
| pGR107-Clal-MGG10972-F       | ccatcgatATGATCAAGACCCTTACAGCCGCT            | Clone MGG_10972 for expression in <i>N. benthamiana</i>                    |
| pGR107-MGG10972-Smal-R       | gggTGAGCACTGAGAGTACCACTGGT                  | Clone MGG_10972 for expression in <i>N. benthamiana</i>                    |
| pGR107-Clal-MGG00677-F       | ccatcgatATGAAGACCTCCGCAGCGCTCCT             | Clone MGG_00677 for expression in <i>N. benthamiana</i>                    |
| pGR107-MGG00677-Smal-R       | gggCTGGACGTTGGCTCCGAACGA                    | Clone MGG_00677 for expression in <i>N. benthamiana</i>                    |
| pGR107-Clal-MGG08537-F       | ccatcgatATGCTCCCCGCTAGCCACGGT               | Clone MGG_08537 for expression in <i>N. benthamiana</i>                    |
| pGR107-MGG08537-Smal-R       | gggAACCTGAACCTCCGCCTGGAAA                   | Clone MGG_08537 for expression in <i>N. benthamiana</i>                    |
| pGR107-Clal-Vd07406-F        | ccatcgatATGAAGTTCATCACAGTCCCT               | Clone VDAG_07406 for expression in <i>N. benthamiana</i>                   |
| pGR107-Vd07406-Smal-R        | gggACTGCACTGGGAGTACCACT                     | Clone VDAG_07406 for expression in <i>N. benthamiana</i>                   |
| pGR107-Clal-Vd04017-F        | ccatcgatATGAAGTTCGACCCCTCCTC                | Clone VDAG_04017 for expression in <i>N. benthamiana</i>                   |
| pGR107-Vd04017-Smal-R        | gggAGAAACAGAAACCTGGTACGA                    | Clone VDAG_04017 for expression in <i>N. benthamiana</i>                   |
| pGR107-Clal-Vd07289-F        | ccatcgatATGAAGCTCCTCGGATTGATCGCT            | Clone VDAG_07289 for expression in <i>N. benthamiana</i>                   |
| pGR107-Vd07289-Smal-R        | gggTAGAAAGTGCAGGTGCTTCCAGCA                 | Clone VDAG_07289 for expression in <i>N. benthamiana</i>                   |
| pGR107-Clal-Vd02125-F        | ccatcgatATGATCAACACTCCTTTTAAG               | Clone VDAG_02125 for expression in <i>N. benthamiana</i>                   |
| pGR107-Vd02125-Smal-R        | gggGAAACCAAACGCAACCCAGTG                    | Clone VDAG_02125 for expression in <i>N. benthamiana</i>                   |
| pGR107-Clal-FGSG05851-F      | ccatcgatATGAAGTTCCTTAGCATTGTT               | Clone FGSG_05851 for expression in <i>N. benthamiana</i>                   |
| pGR107-FGSG05851-Sma I-R     | gggGTTGACAGACAGACTGTAGGCA                   | Clone FGSG_05851 for expression in <i>N. benthamiana</i>                   |
| pGR107-Clal-FGSG11037-F      | ccatcgatATGAAGCCTCTGTGCGATTCC               | Clone FGSG_11037 for expression in <i>N. benthamiana</i>                   |
| pGR107-FGSG11037-Sma I-R     | gggGTTGATGTGAGCGTTGAAGTTG                   | Clone FGSG_11037 for expression in <i>N. benthamiana</i>                   |
| pGR107-Clal-FGSG07892-F      | ccatcgatATGACAATTTCGTTCTCGTCA               | Clone FGSG_07892 for expression in <i>N. benthamiana</i>                   |
| pGR107-FGSG07892-Sma I-R     | gggAGCCTTCTTCCAACGTTTATTG                   | Clone FGSG_07892 for expression in <i>N. benthamiana</i>                   |
| pGR107-Clal-Xo58580699-F     | ccatcgatATGCACACCCGCCATCCAGA                | Clone 58580699 of <i>X. oryzae</i> for expression in <i>N. benthamiana</i> |
| pGR107-Xo58580699-Sma I-R    | gggAAGCCCGCTCGGCCGCGCAGGTA                  | Clone 58580699 of <i>X. oryzae</i> for expression in <i>N. benthamiana</i> |
| pGR107-Clal-109681-E136D-F1  | ccatcgatATGAAGGGATTCTTCGCC                  | Expression the mutation (E136D) of XEG1 in <i>N. benthamiana</i>           |
| pGR107-109681-E136D-R1       | GGCCAGCCAGATCATGATATCGTACTCGTTGCTGC<br>CGCT | Expression the mutation (E136D) of XEG1 in <i>N. benthamiana</i>           |
| pGR107-109681-E136D-F2       | TACGATATCATGATCTGGCTGGCC                    | Expression the mutation (E136D) of XEG1 in <i>N. benthamiana</i>           |
| pGR107-109681-E136D-Sma I-R2 | gggGTTGACCGCAGCCGAGAACGA                    | Expression the mutation (E136D) of XEG1 in <i>N. benthamiana</i>           |
| pGR107-Clal-109681-E222D-F1  | ccatcgatATGAAGGGATTCTTCGCCGGT               | Expression the mutation (E222D) of XEG1 in <i>N. benthamiana</i>           |
| pGR107-109681-E222D-R1       | GTGCCGCTCGAGCGTGAT                          | Expression the mutation (E222D) of XEG1 in <i>N. benthamiana</i>           |
| pGR107-109681-E222D-R2       | TCATCTTGCGTTCGTGCCACGAACGGATCCGT            | Expression the mutation (E222D) of XEG1 in <i>N. benthamiana</i>           |

|                             |                                                      |                                                                                                                                                           |
|-----------------------------|------------------------------------------------------|-----------------------------------------------------------------------------------------------------------------------------------------------------------|
|                             | GCCGGCCTCGAGCGTG                                     |                                                                                                                                                           |
| pGR107-109681-E222D-R3      | CGAGAACGAGGATACGGTCATCTGGCGTTCGTG                    | Expression the mutation (E222D) of XEG1 in <i>N. benthamiana</i>                                                                                          |
|                             | CCCACG                                               |                                                                                                                                                           |
| pGR107-109681-E222D-Smal-R4 | gggGTTGACCGCAGCCGAGAACGAGGATACGGT                    | Expression the mutation (E222D) of XEG1 in <i>N. benthamiana</i>                                                                                          |
| Q-RT-NbCyp71D20-F           | GTTGACGCCATTGTTGAG                                   | RT-qPCR for validation of <i>Cyp71D20</i> gene transcription level for <i>N. benthamiana</i> leaves treated peptides                                      |
| Q-RT-NbCyp71D20-R           | ATCTTCGCCTCCTAATGC                                   | RT-qPCR for validation of <i>Cyp71D20</i> gene transcription level for <i>N. benthamiana</i> leaves treated peptides                                      |
| Q-RT-109681-F               | CACCAAGACCATCACCAA                                   | RT-qPCR for validation of XEG1 gene transcription level in silencing lines and overexpressing lines, also wild type P6497 different stages of development |
| Q-RT-109681-R               | ATGAGGTA CTGGCTGGAA                                  | RT-qPCR for validation of XEG1 gene transcription level in silencing lines and overexpressing lines, also wild type P6497 different stages of development |
| Q-RT-119627-F               | CTACATCATCTACAACAACCTG                               | RT-qPCR for validation of 119627 gene transcription level in silencing lines and overexpressing lines                                                     |
| Q-RT-119627-R               | GGCGAACGACTTGACATT                                   | RT-qPCR for validation of 119627 gene transcription level in silencing lines and overexpressing lines                                                     |
| Q-RT-138787-F               | CTACATCATCTACAACAACCTG                               | RT-qPCR for validation of 138787 gene transcription level in silencing lines and overexpressing lines                                                     |
| Q-RT-138787-R               | GAACGACTTGACGCTCTT                                   | RT-qPCR for validation of 138787 gene transcription level in silencing lines and overexpressing lines                                                     |
| Q-RT-109280-F               | TTGGCCTCTAACCGACAG                                   | RT-qPCR for validation of 109280 gene transcription level in silencing lines and overexpressing lines                                                     |
| Q-RT-109280-R               | GACTTCTTGGCGACGTAC                                   | RT-qPCR for validation of 109280 gene transcription level in silencing lines and overexpressing lines                                                     |
| Q-RT-144813-F               | AACTCGTTGTCGTGCTCG                                   | RT-qPCR for validation of 144813 gene transcription level in silencing lines and overexpressing lines                                                     |
| Q-RT-144813-R               | CTTGTTCCAGAGGTTGTTGTAG                               | RT-qPCR for validation of 144813 gene transcription level in silencing lines and overexpressing lines                                                     |
| Q-RT-140300-F               | CTGGCAGGTCAAGTCGTT                                   | RT-qPCR for validation of 140300 gene transcription level in silencing lines and overexpressing lines                                                     |
| Q-RT-140300-R               | TCGTGAAGAGGTCGTAGG                                   | RT-qPCR for validation of 140300 gene transcription level in silencing lines and overexpressing lines                                                     |
| Q-RT-140302-F               | GCAACATGACGGTCTACT                                   | RT-qPCR for validation of 140302 gene transcription level in silencing lines and overexpressing lines                                                     |
| Q-RT-140302-F               | CGATGGTGAGATTCTGG                                    | RT-qPCR for validation of 140302 gene transcription level in silencing lines and overexpressing lines                                                     |
| pTORM-XbaI-109681-Sil-F     | gctctagaATGAAGGATTCTTCGCCG                           | Silencing of XEG1 in <i>P. sojae</i>                                                                                                                      |
| pTORM-109681-Sil-EcoRI-R    | cggaaattcTCAGTTGACCGCAGCCGAGAACGA                    | Silencing of XEG1 in <i>P. sojae</i>                                                                                                                      |
| pTORM-EcoR I-109681-OE-F    | ggaattcacaacaATGAAGGATTCTTCGCCG                      | Over-expression of XEG1 in <i>P. sojae</i>                                                                                                                |
| pTORM-109681-OE-Xba I-R     | gctctagaTCAGTGATGGTGATGGTGATGGTTGACCG<br>CAGCCGAGAAC | Over-expression of XEG1 in <i>P. sojae</i>                                                                                                                |
| TRV2-Smal-LeEIX2-F          | gggATCTGCCAGCTTCAATTTCTTCAG                          | Silencing of <i>EIX2</i> in tomato                                                                                                                        |
| TRV2-LeEIX2-BamHI-R         | cgggatccGATAAGTGGTTGTTCCGATAAGTC                     | Silencing of <i>EIX2</i> in tomato                                                                                                                        |
| pBINPLUS-KpnI-Avh52-F       | ggggatccCTCACGTTGACCAAGGATTCCA                       | Agroinfiltration in <i>N.benthamiana</i> and suppressing assay of PTI triggered by XEG1                                                                   |
| pBINPLUS-Avh52-BamHI-R      | cgggatccTCAGTTGGCCGCCTTATAAACCT                      | Agroinfiltration in <i>N.benthamiana</i> and suppressing assay of PTI triggered by XEG1                                                                   |
| pBINPLUS-KpnI-Avh62-F       | ggggatccGTCCAGGAATCGACTGAGACGCA                      | Agroinfiltration in <i>N.benthamiana</i> and suppressing assay of PTI triggered by XEG1                                                                   |
| pBINPLUS-Avh62-BamHI-R      | cgggatccTTATCTGGTAATTTGCCGCAAC                       | Agroinfiltration in <i>N.benthamiana</i> and suppressing assay of PTI                                                                                     |



---

|                         |                                   |                                                                                            |
|-------------------------|-----------------------------------|--------------------------------------------------------------------------------------------|
| pBINPLUS-KpnI-Avh94-F   | ggggatccGCCAACACCAAGGTGGAGTCGT    | triggered by XEG1<br>Agroinfiltration in <i>N.benthamiana</i> and suppressing assay of PTI |
| pBINPLUS-Avh94-BamHI-R  | cgggatccCTAAGCGGTGTCTCTCTCTCTCT   | triggered by XEG1<br>Agroinfiltration in <i>N.benthamiana</i> and suppressing assay of PTI |
| pBINPLUS-SmaI-Avh109-F  | gggCTTCAGGTCCTCCCAATTCCG          | triggered by XEG1<br>Agroinfiltration in <i>N.benthamiana</i> and suppressing assay of PTI |
| pBINPLUS-Avh109-BamHI-R | cgggatccTTAATCAGCGTTTGTGCGCTGT    | triggered by XEG1<br>Agroinfiltration in <i>N.benthamiana</i> and suppressing assay of PTI |
| pFF19-BamH I-109681-F   | cgggatccATGAAGGGATTCTTCGCCG       | Bombardment assays in Soybean                                                              |
| pFF19-109681-Sph I-R    | acatgcatgcTCAGTTGACCGCAGCCGAGAAC  | Bombardment assays in Soybean                                                              |
| pFF19-BamH I-Avh52-F    | cgggatccCTCACGTTGACCAAGGATTCCA    | Bombardment assays in Soybean                                                              |
| pFF19-Avh52-Sph I-R     | acatgcatgcTCAGTTGGCCGCTTATAAACCT  | Bombardment assays in Soybean                                                              |
| pFF19-BamH I-Avh62-F    | cgggatccGTCCAGGAATCGACTGAGACGCA   | Bombardment assays in Soybean                                                              |
| pFF19-Avh62-Sph I-R     | acatgcatgcTTATCTGGTAATTGCCGCAAC   | Bombardment assays in Soybean                                                              |
| pFF19-BamH I-Avh94-F    | cgggatccGCCAACACCAAGGTGGAGTCGT    | Bombardment assays in Soybean                                                              |
| pFF19-Avh94-Sph I-R     | acatgcatgcCTAAGCGGTGTCTCTCTCTCTCT | Bombardment assays in Soybean                                                              |
| pFF19-BamH I-Avh109-F   | cgggatccCTTCAGGTCCTCCCAATTCCG     | Bombardment assays in Soybean                                                              |
| pFF19-Avh109-Sph I-R    | acatgcatgcTTAATCAGCGTTTGTGCGCTGT  | Bombardment assays in Soybean                                                              |

---

<sup>a</sup>Upper case bases match the template, lower case bases do not.

**Supplemental Table 3. Plasmid constructs used in the study.**

| Plasmid name                            | Vector  | Purpose                                                                   |
|-----------------------------------------|---------|---------------------------------------------------------------------------|
| pGR107::109281                          | pGR107  | Clone 109281 for expression in <i>N. benthamiana</i>                      |
| pGR107::109681                          | pGR107  | Clone 109681 for expression in <i>N. benthamiana</i>                      |
| pGR107::137930                          | pGR107  | Clone 137930 for expression in <i>N. benthamiana</i>                      |
| pGR107::GFP                             | pGR107  | Clone GFP for expression in <i>N. benthamiana</i>                         |
| pGR107::INF1                            | pGR107  | Clone INF1 for expression in <i>N. benthamiana</i>                        |
| pPICZaA::109681                         | pPICZaA | Expression of 109681 in <i>Pichia pastoris</i> for purification           |
| pPICZaA::E136D                          | pPICZaA | Expression of E136D in <i>Pichia pastoris</i> for purification            |
| pPICZaA::E222D                          | pPICZaA | Expression of E222D in <i>Pichia pastoris</i> for purification            |
| pGR107::PR1-SP-109681 <sup>20-241</sup> | pGR107  | Expression of PR1-SP-109681 <sup>20-241</sup> in <i>N. benthamiana</i>    |
| pGR107::109681 <sup>20-241</sup>        | pGR107  | Expression of 109681 <sup>20-241</sup> in <i>N. benthamiana</i>           |
| pGR107::144813                          | pGR107  | Clone 144813 of <i>P. sojae</i> for expression in <i>N. benthamiana</i>   |
| pGR107::119627                          | pGR107  | Clone 119627 of <i>P. sojae</i> for expression in <i>N. benthamiana</i>   |
| pGR107::138787                          | pGR107  | Clone 138787 of <i>P. sojae</i> for expression in <i>N. benthamiana</i>   |
| pGR107::140300                          | pGR107  | Clone 140300 of <i>P. sojae</i> for expression in <i>N. benthamiana</i>   |
| pGR107::140302                          | pGR107  | Clone 140302 of <i>P. sojae</i> for expression in <i>N. benthamiana</i>   |
| pGR107::109280                          | pGR107  | Clone 109280 of <i>P. sojae</i> for expression in <i>N. benthamiana</i>   |
| pGR107::109281                          | pGR107  | Clone 109281 of <i>P. sojae</i> for expression in <i>N. benthamiana</i>   |
| pGR107::140301                          | pGR107  | Clone 140301 of <i>P. sojae</i> for expression in <i>N. benthamiana</i>   |
| pGR107::140303                          | pGR107  | Clone 140303 of <i>P. sojae</i> for expression in <i>N. benthamiana</i>   |
| pGR107::140289                          | pGR107  | Clone 140289 of <i>P. sojae</i> for expression in <i>N. benthamiana</i>   |
| pGR107::Pc111741                        | pGR107  | Clone 111741 of <i>P. capsici</i> for expression in <i>N. benthamiana</i> |
| pGR107::Pc98553                         | pGR107  | Clone 98553 of <i>P. capsici</i> for expression in <i>N. benthamiana</i>  |
| pGR107::Pc99469                         | pGR107  | Clone 99469 of <i>P. capsici</i> for expression in <i>N. benthamiana</i>  |
| pGR107::Pc107440                        | pGR107  | Clone 107440 of <i>P. capsici</i> for expression in <i>N. benthamiana</i> |
| pGR107::Pc107334                        | pGR107  | Clone 107334 of <i>P. capsici</i> for expression in <i>N. benthamiana</i> |
| pGR107::Pc106898                        | pGR107  | Clone 106898 of <i>P. capsici</i> for expression in <i>N. benthamiana</i> |
| pGR107::Pc107122                        | pGR107  | Clone 107122 of <i>P. capsici</i> for expression in <i>N. benthamiana</i> |
| pGR107::Pc15454                         | pGR107  | Clone 15454 of <i>P. capsici</i> for expression in <i>N. benthamiana</i>  |
| pGR107::Pc15453                         | pGR107  | Clone 15453 of <i>P. capsici</i> for expression in <i>N. benthamiana</i>  |
| pGR107::Pc107461                        | pGR107  | Clone 107461 of <i>P. capsici</i> for expression in <i>N. benthamiana</i> |
| pGR107::Pc15451                         | pGR107  | Clone 15451 of <i>P. capsici</i> for expression in <i>N. benthamiana</i>  |
| pGR107::Pc7335                          | pGR107  | Clone 7335 of <i>P. capsici</i> for expression in <i>N. benthamiana</i>   |
| pGR107::PPIG19377                       | pGR107  | Clone PPTG_19377 for expression in <i>N. benthamiana</i>                  |
| pGR107::PPIG19378                       | pGR107  | Clone PPTG_19378 for expression in <i>N. benthamiana</i>                  |
| pGR107::PPIG16567                       | pGR107  | Clone PPTG_16567 for expression in <i>N. benthamiana</i>                  |
| pGR107::PPIG16566                       | pGR107  | Clone PPTG_16566 for expression in <i>N. benthamiana</i>                  |
| pGR107::PPIG19220                       | pGR107  | Clone PPTG_19220 for expression in <i>N. benthamiana</i>                  |
| pGR107::PPIG16273                       | pGR107  | Clone PPTG_16273 for expression in <i>N. benthamiana</i>                  |
| pGR107::PPIG16272                       | pGR107  | Clone PPTG_16272 for expression in <i>N. benthamiana</i>                  |
| pGR107::PPIG19219                       | pGR107  | Clone PPTG_19219 for expression in <i>N. benthamiana</i>                  |
| pGR107::PPIG16267                       | pGR107  | Clone PPTG_16267 for expression in <i>N. benthamiana</i>                  |
| pGR107::PPIG16271                       | pGR107  | Clone PPTG_16271 for expression in <i>N. benthamiana</i>                  |
| pGR107::PPIG19278                       | pGR107  | Clone PPTG_19278 for expression in <i>N. benthamiana</i>                  |
| pGR107::PITG06962                       | pGR107  | Clone PITG_06962 for expression in <i>N. benthamiana</i>                  |

|                                                |        |                                                                                                                |
|------------------------------------------------|--------|----------------------------------------------------------------------------------------------------------------|
| pGR107::PITG16991                              | pGR107 | Clone PITG_16991 for expression in <i>N. benthamiana</i>                                                       |
| pGR107::PITG08944                              | pGR107 | Clone PITG_08944 for expression in <i>N. benthamiana</i>                                                       |
| pGR107::PITG16992                              | pGR107 | Clone PITG_16992 for expression in <i>N. benthamiana</i>                                                       |
| pGR107::PITG14060                              | pGR107 | Clone PITG_14060 for expression in <i>N. benthamiana</i>                                                       |
| pGR107::PITG13560                              | pGR107 | Clone PITG_13560 for expression in <i>N. benthamiana</i>                                                       |
| pGR107::MGG10972                               | pGR107 | Clone MGG_10972 for expression in <i>N. benthamiana</i>                                                        |
| pGR107::MGG00677                               | pGR107 | Clone MGG_00677 for expression in <i>N. benthamiana</i>                                                        |
| pGR107::MGG08537                               | pGR107 | Clone MGG_08537 for expression in <i>N. benthamiana</i>                                                        |
| pGR107::Vd07406                                | pGR107 | Clone VDAG_07406 for expression in <i>N. benthamiana</i>                                                       |
| pGR107::Vd04017                                | pGR107 | Clone VDAG_04017 for expression in <i>N. benthamiana</i>                                                       |
| pGR107::Vd07289                                | pGR107 | Clone VDAG_07289 for expression in <i>N. benthamiana</i>                                                       |
| pGR107::Vd02125                                | pGR107 | Clone VDAG_02125 for expression in <i>N. benthamiana</i>                                                       |
| pGR107::FGSG05851                              | pGR107 | Clone FGSG_05851 for expression in <i>N. benthamiana</i>                                                       |
| pGR107::FGSG11037                              | pGR107 | Clone FGSG_11037 for expression in <i>N. benthamiana</i>                                                       |
| pGR107::FGSG07892                              | pGR107 | Clone FGSG_07892 for expression in <i>N. benthamiana</i>                                                       |
| pGR107::Xo58580699                             | pGR107 | Clone 58580699 of <i>X. oryzae</i> for expression in <i>N. benthamiana</i>                                     |
| pGR107::E136D                                  | pGR107 | Expression the mutation (E136D) of 109681 in <i>N. benthamiana</i>                                             |
| pGR107::E222D                                  | pGR107 | Expression the mutation (E222D) of 109681 in <i>N. benthamiana</i>                                             |
| pGR107::109681 <sup>1-221</sup>                | pGR107 | Expression the C-terminal deletions mutation (109681 <sup>1-221</sup> ) of XEG1 in <i>N. benthamiana</i>       |
| pGR107::109681 <sup>1-19-40-241</sup>          | pGR107 | Expression the N-terminal deletions mutation (109681 <sup>1-19-40-241</sup> ) of XEG1 in <i>N. benthamiana</i> |
| pGR107::109681 <sup>1-97</sup>                 | pGR107 | Expression the N-terminal deletions mutation (109681 <sup>1-97</sup> ) of XEG1 in <i>N. benthamiana</i>        |
| pTORM::109681 <sup>241-1</sup>                 | pTORM  | Silencing of 109681 in <i>P. sojae</i>                                                                         |
| pTORM::109681 <sup>1-241-6<sup>HIS</sup></sup> | pTORM  | Over expressing of 109681 in <i>P. sojae</i>                                                                   |
| TRV1                                           | TRV1   | Silencing of <i>Serk1</i> in <i>N.benthamiana</i>                                                              |
| TRV2::PDS                                      | TRV2   | Reference for silencing of <i>Serk1</i> in <i>N.benthamiana</i>                                                |
| TRV2::GFP                                      | TRV2   | Negative control for silencing of <i>Serk1</i> in <i>N.benthamiana</i>                                         |
| TRV2::Serk1                                    | TRV2   | Silencing of <i>Serk1</i> in <i>N.benthamiana</i>                                                              |
| pGR107::Avr3a                                  | pGR107 | Agroinfiltration in <i>N.benthamiana</i> of silencing <i>Serk1</i>                                             |
| pGR107::Rps3a                                  | pGR107 | Agroinfiltration in <i>N.benthamiana</i> of silencing <i>Serk1</i>                                             |
| pGR107::Avh5                                   | pGR107 | Agroinfiltration in <i>N.benthamiana</i> and suppressing assay of HR triggered by XEG1                         |
| pGR107::Avh7b1                                 | pGR107 | Agroinfiltration in <i>N.benthamiana</i> and suppressing assay of HR triggered by XEG1                         |
| pGR107::Avh23                                  | pGR107 | Agroinfiltration in <i>N.benthamiana</i> and suppressing assay of HR triggered by XEG1                         |
| pGR107::Avh38                                  | pGR107 | Agroinfiltration in <i>N.benthamiana</i> and suppressing assay of HR triggered by XEG1                         |
| pGR107::Avh52                                  | pGR107 | Agroinfiltration in <i>N.benthamiana</i> and suppressing assay of HR triggered by XEG1                         |
| pGR107::Avh62                                  | pGR107 | Agroinfiltration in <i>N.benthamiana</i> and suppressing assay of HR triggered by XEG1                         |
| pGR107::Avh64                                  | pGR107 | Agroinfiltration in <i>N.benthamiana</i> and suppressing assay of HR triggered by XEG1                         |
| pGR107::Avh94a1                                | pGR107 | Agroinfiltration in <i>N.benthamiana</i> and suppressing assay of HR triggered by XEG1                         |
| pGR107::Avh98a                                 | pGR107 | Agroinfiltration in <i>N.benthamiana</i> and suppressing assay of HR triggered by XEG1                         |
| pGR107::Avh109                                 | pGR107 | Agroinfiltration in <i>N.benthamiana</i> and suppressing assay of HR triggered by XEG1                         |
| pGR107::Avh115                                 | pGR107 | Agroinfiltration in <i>N.benthamiana</i> and suppressing assay of HR triggered by XEG1                         |
| pGR107::Avh140                                 | pGR107 | Agroinfiltration in <i>N.benthamiana</i> and suppressing assay of HR triggered by XEG1                         |
| pGR107::Avh180                                 | pGR107 | Agroinfiltration in <i>N.benthamiana</i> and suppressing assay of HR triggered by XEG1                         |
| pGR107::Avh196                                 | pGR107 | Agroinfiltration in <i>N.benthamiana</i> and suppressing assay of HR triggered by XEG1                         |
| pGR107::Avh231                                 | pGR107 | Agroinfiltration in <i>N.benthamiana</i> and suppressing assay of HR triggered by XEG1                         |
| pGR107::Avh240                                 | pGR107 | Agroinfiltration in <i>N.benthamiana</i> and suppressing assay of HR triggered by XEG1                         |



---

|                  |          |                                                                                         |
|------------------|----------|-----------------------------------------------------------------------------------------|
| pGR107::Avh263   | pGR107   | Agroinfiltration in <i>N.benthamiana</i> and suppressing assay of HR triggered by XEG1  |
| pGR107::Avh277   | pGR107   | Agroinfiltration in <i>N.benthamiana</i> and suppressing assay of HR triggered by XEG1  |
| pGR107::Avh283   | pGR107   | Agroinfiltration in <i>N.benthamiana</i> and suppressing assay of HR triggered by XEG1  |
| pGR107::Avh320   | pGR107   | Agroinfiltration in <i>N.benthamiana</i> and suppressing assay of HR triggered by XEG1  |
| pGR107::Avh328   | pGR107   | Agroinfiltration in <i>N.benthamiana</i> and suppressing assay of HR triggered by XEG1  |
| pGR107::Avh331   | pGR107   | Agroinfiltration in <i>N.benthamiana</i> and suppressing assay of HR triggered by XEG1  |
| pGR107::Avh333   | pGR107   | Agroinfiltration in <i>N.benthamiana</i> and suppressing assay of HR triggered by XEG1  |
| pGR107::Avh345   | pGR107   | Agroinfiltration in <i>N.benthamiana</i> and suppressing assay of HR triggered by XEG1  |
| pGR107::Avh360   | pGR107   | Agroinfiltration in <i>N.benthamiana</i> and suppressing assay of HR triggered by XEG1  |
| pGR107::Avh432   | pGR107   | Agroinfiltration in <i>N.benthamiana</i> and suppressing assay of HR triggered by XEG1  |
| pBINPLUS::GFP    | pBINPLUS | Agroinfiltration in <i>N.benthamiana</i> and suppressing assay of PTI triggered by XEG1 |
| pBINPLUS::Avh52  | pBINPLUS | Agroinfiltration in <i>N.benthamiana</i> and suppressing assay of PTI triggered by XEG1 |
| pBINPLUS::Avh62  | pBINPLUS | Agroinfiltration in <i>N.benthamiana</i> and suppressing assay of PTI triggered by XEG1 |
| pBINPLUS::Avh94  | pBINPLUS | Agroinfiltration in <i>N.benthamiana</i> and suppressing assay of PTI triggered by XEG1 |
| pBINPLUS::Avh109 | pBINPLUS | Agroinfiltration in <i>N.benthamiana</i> and suppressing assay of PTI triggered by XEG1 |
| pFF19::109681    | pFF19    | Bombardment assays in Soybean                                                           |
| pFF19::Avh52     | pFF19    | Bombardment assays in Soybean                                                           |
| pFF19::Avh62     | pFF19    | Bombardment assays in Soybean                                                           |
| pFF19::Avh94     | pFF19    | Bombardment assays in Soybean                                                           |
| pFF19::Avh109    | pFF19    | Bombardment assays in Soybean                                                           |
| pFF19::GUS       | pFF19    | Bombardment assays in Soybean                                                           |
| TRV2::EIX2       | TRV2     | Silencing of <i>EIX2</i> in tomato                                                      |
| TRV2::PDS        | TRV2     | Reference for silencing of <i>EIX2</i> in tomato                                        |
| pGR107::EIX      | pGR107   | Clone EIX for expression in <i>N. benthamiana</i>                                       |

---
